# Supplementary material for: Isomerization reaction of head-to-head α-pyridonato-bridged ethylenediaminepalladium(ii) binuclear complex, [Pd2(en)2(C5H4NO)2]2+, in aqueous solution
Source: Royal Society of Chemistry journal article supplement (doi:10.1039/b515743a), 2006-01-01
Supplement: b515743a.pdf [file b515743a.pdf]

*Supplementary Information*

**Isomerization Reaction of Head-to-Head  $\alpha$ -Pyridonato-Bridged Ethylenediamine-palladium(II) Binuclear Complex,  $[\text{Pd}_2(\text{en})_2(\text{C}_5\text{H}_4\text{NO})_2]^{2+}$ , in Aqueous Solution**

Satoshi Iwatsuki, Tomohiro Itou, Hideaki Ito, Hiroki Mori, Kuzuhiko Uemura, Yushinobu Yokomori, Koji Ishihara and Kazuko Matsumoto

**Table S1.** Observed rate constants for the reaction of  $[\text{Pd}(\text{en})(\text{H}_2\text{O})_2]^{2+}$  with  $\alpha$ -pyridone ( $I = 0.10 \text{ mol dm}^{-3}$ ,  $20^\circ\text{C}$ ,  $C_L = 4 \times 10^{-4} \text{ mol dm}^{-3}$ )

| $[\text{H}^+] / \text{mmol dm}^{-3}$ | $C_{\text{Pd}} / \text{mmol dm}^{-3}$ | $10^2 k_{\text{obs}} / \text{s}^{-1}$ |
|--------------------------------------|---------------------------------------|---------------------------------------|
| 2.50                                 | 16                                    | 1.89                                  |
|                                      | 20                                    | 2.20                                  |
|                                      | 24                                    | 2.53                                  |
|                                      | 28                                    | 2.84                                  |
| 5.00                                 | 16                                    | 1.65                                  |
|                                      | 20                                    | 1.92                                  |
|                                      | 24                                    | 2.18                                  |
|                                      | 28                                    | 2.46                                  |
| 7.50                                 | 16                                    | 1.59                                  |
|                                      | 20                                    | 1.83                                  |
|                                      | 24                                    | 2.09                                  |
|                                      | 28                                    | 2.35                                  |
| 10.0                                 | 16                                    | 1.55                                  |
|                                      | 20                                    | 1.80                                  |
|                                      | 24                                    | 2.07                                  |
|                                      | 28                                    | 2.31                                  |

**Table S2.** The concentrations of the dimers (HH and HT) and monomers (A, B, C, and their deprotonated species) estimated by the  $^1\text{H}$  NMR peak integrals at  $I = 0.1$  M and  $26^\circ\text{C}$  after completion of the reaction <sup>a</sup>

| pD   | $C_{\text{L(Add)}} / \text{mmol dm}^{-3}$ | [species] / $\text{mmol dm}^{-3}$ <sup>b</sup> |              |                                                   |                                        |                                                   |                                        |                                                   |                                                   |
|------|-------------------------------------------|------------------------------------------------|--------------|---------------------------------------------------|----------------------------------------|---------------------------------------------------|----------------------------------------|---------------------------------------------------|---------------------------------------------------|
|      |                                           | [HH]                                           | [HT]         | $\frac{[\text{A}']}{([\text{A}_1]+[\text{A}_2])}$ | $\frac{[\text{A}''']}{([\text{A}_3])}$ | $\frac{[\text{B}']}{([\text{B}_1]+[\text{B}_2])}$ | $\frac{[\text{B}''']}{([\text{B}_3])}$ | $\frac{[\text{C}']}{([\text{C}_1]+[\text{C}_2])}$ | $\frac{[\text{L}']}{([\text{L}]+[\text{HL}^+] )}$ |
| 1.16 | 0                                         | <sup>c</sup>                                   | <sup>c</sup> | 0.9                                               | <sup>c</sup>                           | 6.2                                               | <sup>c</sup>                           | 8.9                                               | 8.0                                               |
| 2.26 | 0                                         | <sup>c</sup>                                   | <sup>c</sup> | 1.5                                               | <sup>c</sup>                           | 7.6                                               | <sup>c</sup>                           | 7.0                                               | 5.4                                               |
| 3.21 | 0                                         | 0.7                                            | 0.4          | 1.3                                               | <sup>c</sup>                           | 6.5                                               | <sup>c</sup>                           | 6.0                                               | 4.8                                               |
| 3.41 | 0                                         | 1.3                                            | 0.8          | 1.0                                               | <sup>c</sup>                           | 5.4                                               | 0.2                                    | 5.2                                               | 4.3                                               |
| 3.55 | 0                                         | 1.5                                            | 0.9          | 0.9                                               | <sup>c</sup>                           | 4.9                                               | 0.2                                    | 5.2                                               | 4.2                                               |
| 3.67 | 0                                         | 1.9                                            | 1.2          | 0.8                                               | <sup>c</sup>                           | 4.3                                               | 0.3                                    | 4.4                                               | 3.9                                               |
| 4.19 | 0                                         | 3.1                                            | 1.9          | 0.3                                               | <sup>c</sup>                           | 2.0                                               | 0.6                                    | 3.1                                               | 2.7                                               |
| 5.21 | 0                                         | 3.8                                            | 2.2          | 0.2                                               | <sup>c</sup>                           | 1.0                                               | 1.1                                    | 1.7                                               | 1.6                                               |
| 6.1  | 0                                         | 3.7                                            | 2.2          | <sup>c</sup>                                      | 0.5                                    | 0.7                                               | 1.4                                    | 1.6                                               | 1.1                                               |
| 3.36 | 8.0                                       | 1.2                                            | 0.7          | 2.3                                               | <sup>c</sup>                           | 6.5                                               | <sup>c</sup>                           | 3.4                                               | 9.1                                               |
| 3.49 | 8.0                                       | 1.7                                            | 1.0          | 2.1                                               | <sup>c</sup>                           | 5.8                                               | <sup>c</sup>                           | 2.7                                               | 8.6                                               |
| 4.05 | 8.0                                       | 3.3                                            | 1.9          | 1.1                                               | <sup>c</sup>                           | 2.7                                               | 0.3                                    | 1.5                                               | 8.3                                               |
| 5.39 | 8.0                                       | 4.3                                            | 2.5          | 0.8                                               | <sup>c</sup>                           | 1.0                                               | 0.3                                    | 0.3                                               | 7.5                                               |

<sup>a</sup>  $C_{\text{HH}} = 8.0 \text{ mmol dm}^{-3}$ . <sup>b</sup>  $\text{HH} = \text{HH} \cdot [\text{Pd}_2(\text{en})_2(\alpha\text{-pyridonato})_2]^{2+}$ ,  $\text{HT} = \text{HT} \cdot [\text{Pd}_2(\text{en})_2(\alpha\text{-pyridonato})_2]^{2+}$ ,  $\text{A}_1 = [\text{Pd}(\text{en})(\alpha\text{-pyridone})_2]^{2+}$ ,  $\text{A}_2 = [\text{Pd}(\text{en})(\alpha\text{-pyridone})(\alpha\text{-pyridonato})]^+$ ,  $\text{A}_3 = [\text{Pd}(\text{en})(\alpha\text{-pyridonato})_2]^0$ ,  $\text{B}_1 = [\text{Pd}(\text{en})(\text{OH}_2)(\alpha\text{-pyridone})]^{2+}$ ,  $\text{B}_2 = [\text{Pd}(\text{en})(\text{OH}_2)(\alpha\text{-pyridonato})]^+$ ,  $\text{B}_3 = [\text{Pd}(\text{en})(\text{OH})(\alpha\text{-pyridonato})]^0$ ,  $\text{C}_1 = [\text{Pd}(\text{en})(\text{OH}_2)_2]^{2+}$ ,  $\text{C}_2 = [\text{Pd}(\text{en})(\text{OH}_2)(\text{OH})]^+$ ,  $\text{L} = \alpha\text{-pyridone}$ , and  $\text{HL}^+ = \text{protonated } \alpha\text{-pyridone}$ . <sup>c</sup> Not observed.

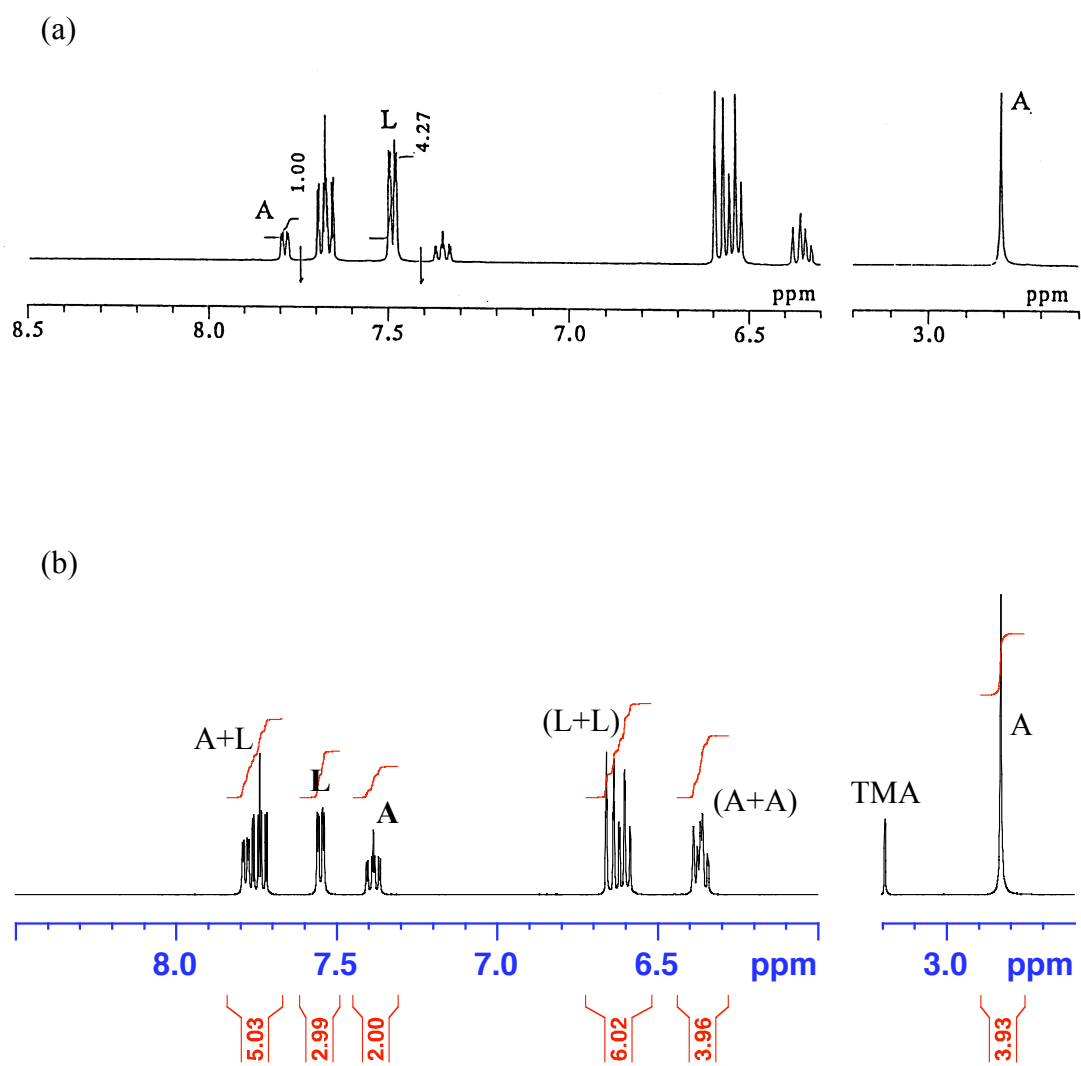

**Fig. S1.**  $^1\text{H}$  NMR spectra of the solution containing  $[\text{Pd}(\text{en})(\text{H}_2\text{O})_2](\text{ClO}_4)_2$  and  $\alpha$ -pyridone at  $C_M:C_L = 1:10$  and  $\text{pH} = 6.06$  (a), and  $C_M:C_L = 1:5$  and  $\text{pD} 7.6$  (b). The chemical shifts are referenced to TSP- $d_4$  as an external reference (a) and TMA as an internal reference (b).

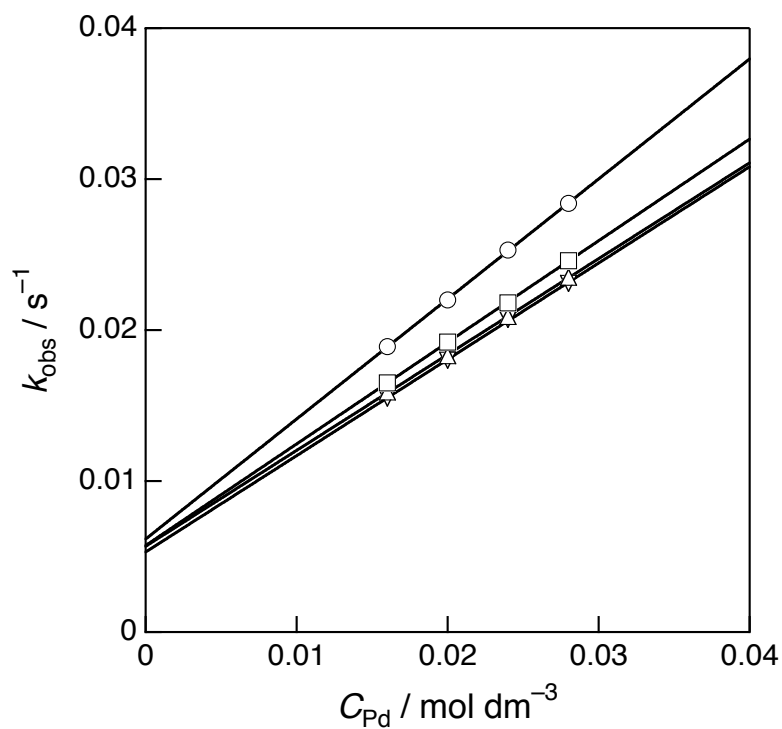

**Fig. S2.** The dependence of the conditional pseudo first-order rate constant ( $k_{\text{obs}}$ ) on  $C_{\text{Pd}}$  for the reaction of  $[\text{Pd}(\text{en})(\text{H}_2\text{O})_2]^{2+}$  with  $\alpha$ -pyridone (L) in acidic aqueous solution at 20°C.  $C_{\text{L}} = 4 \times 10^{-4} \text{ mol dm}^{-3}$ .  $[\text{H}^+] / \text{mol dm}^{-3} = 2.50 \times 10^{-3}$  ( $\circ$ ),  $5.00 \times 10^{-3}$  ( $\square$ ),  $7.50 \times 10^{-3}$  ( $\nabla$ ), and  $1.00 \times 10^{-2}$  ( $\triangle$ ).

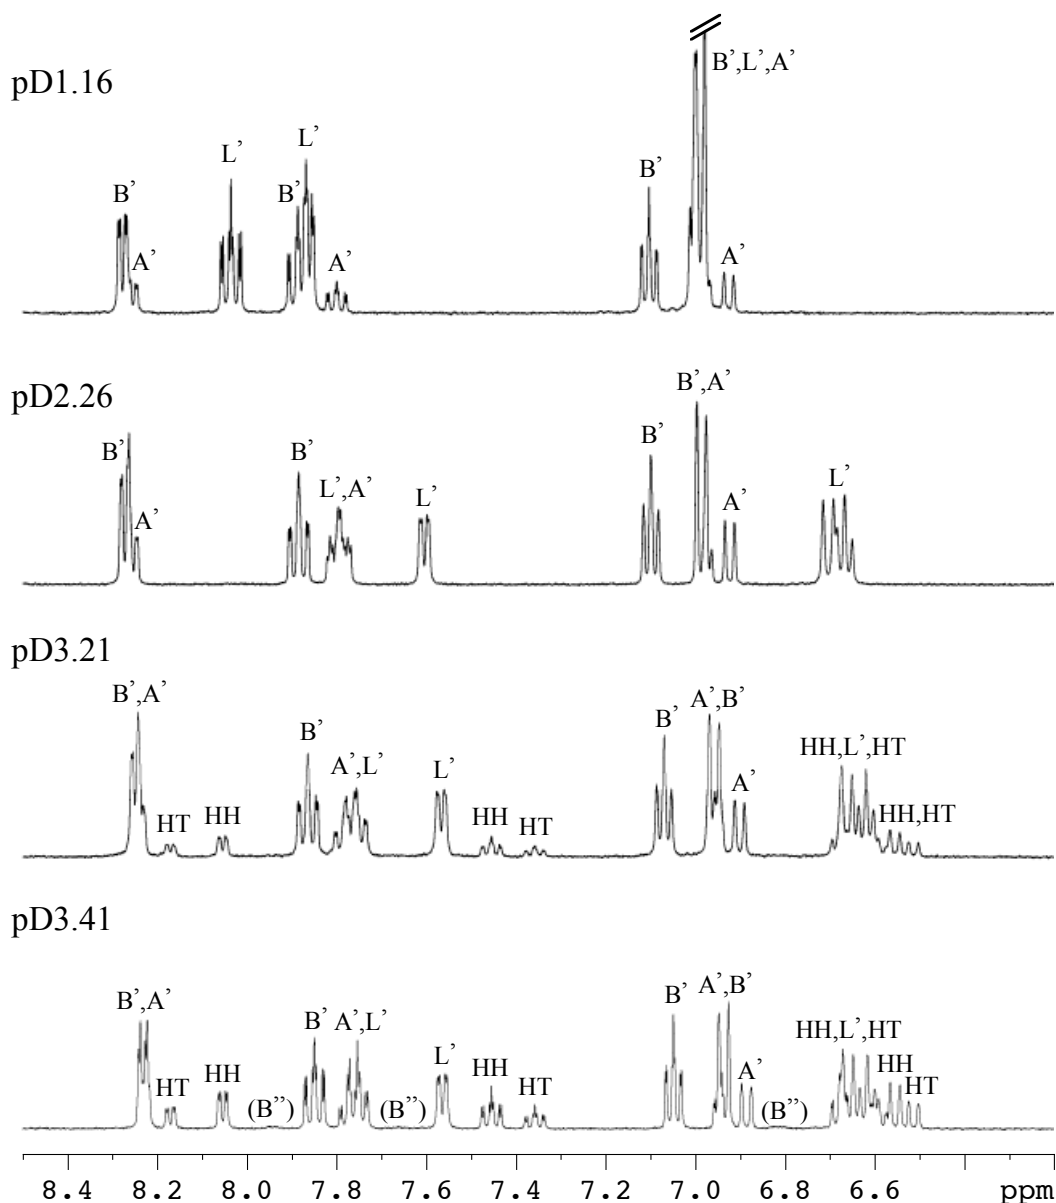

**Fig. S3.** Detailed assignments of the  $^1\text{H}$  NMR signals in the region of  $\alpha$ -pyridone moiety (8.5–6.2 ppm).  $C_{\text{HH}} = 8.0$  mM,  $C_{\text{L(Add)}} = 0$  M,  $I = 0.1$  M, and  $T = 26^\circ\text{C}$ .

Symbol notations used in this figure are as follows;

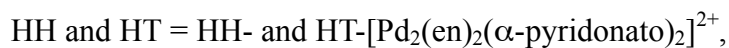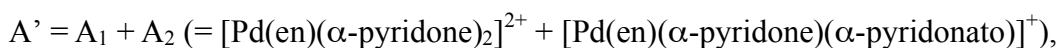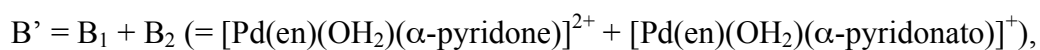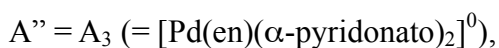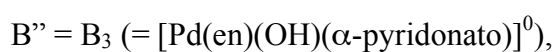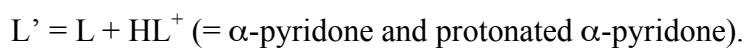

pD3.55

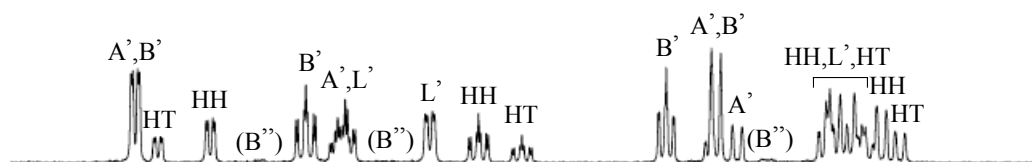

pD3.67

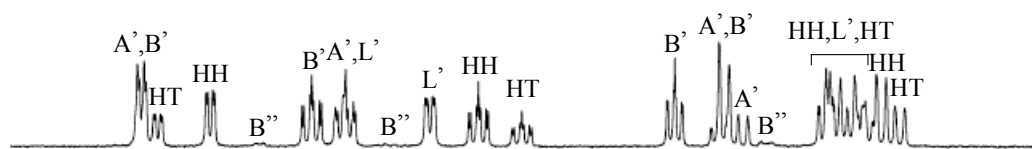

pD4.19

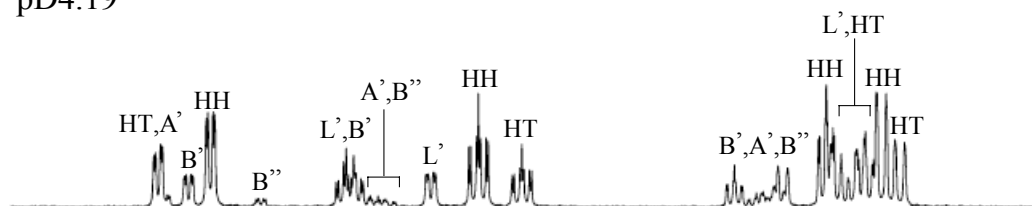

pD5.21

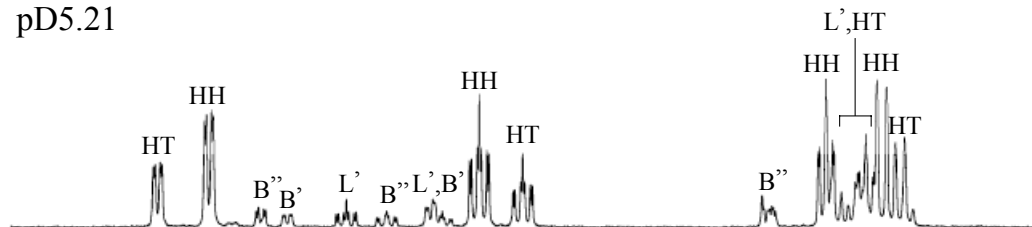

pD6.1

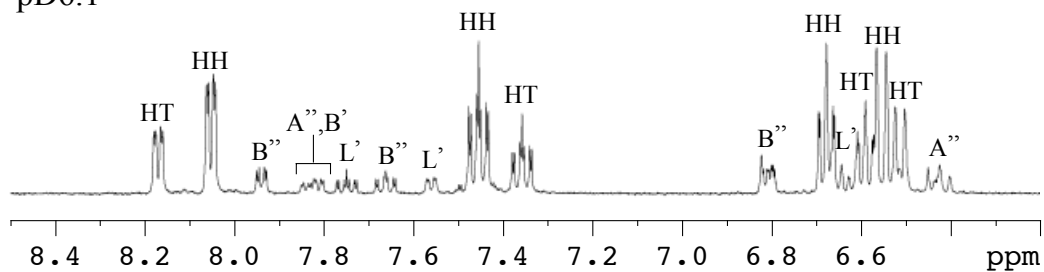

(Fig. S3, continued.)

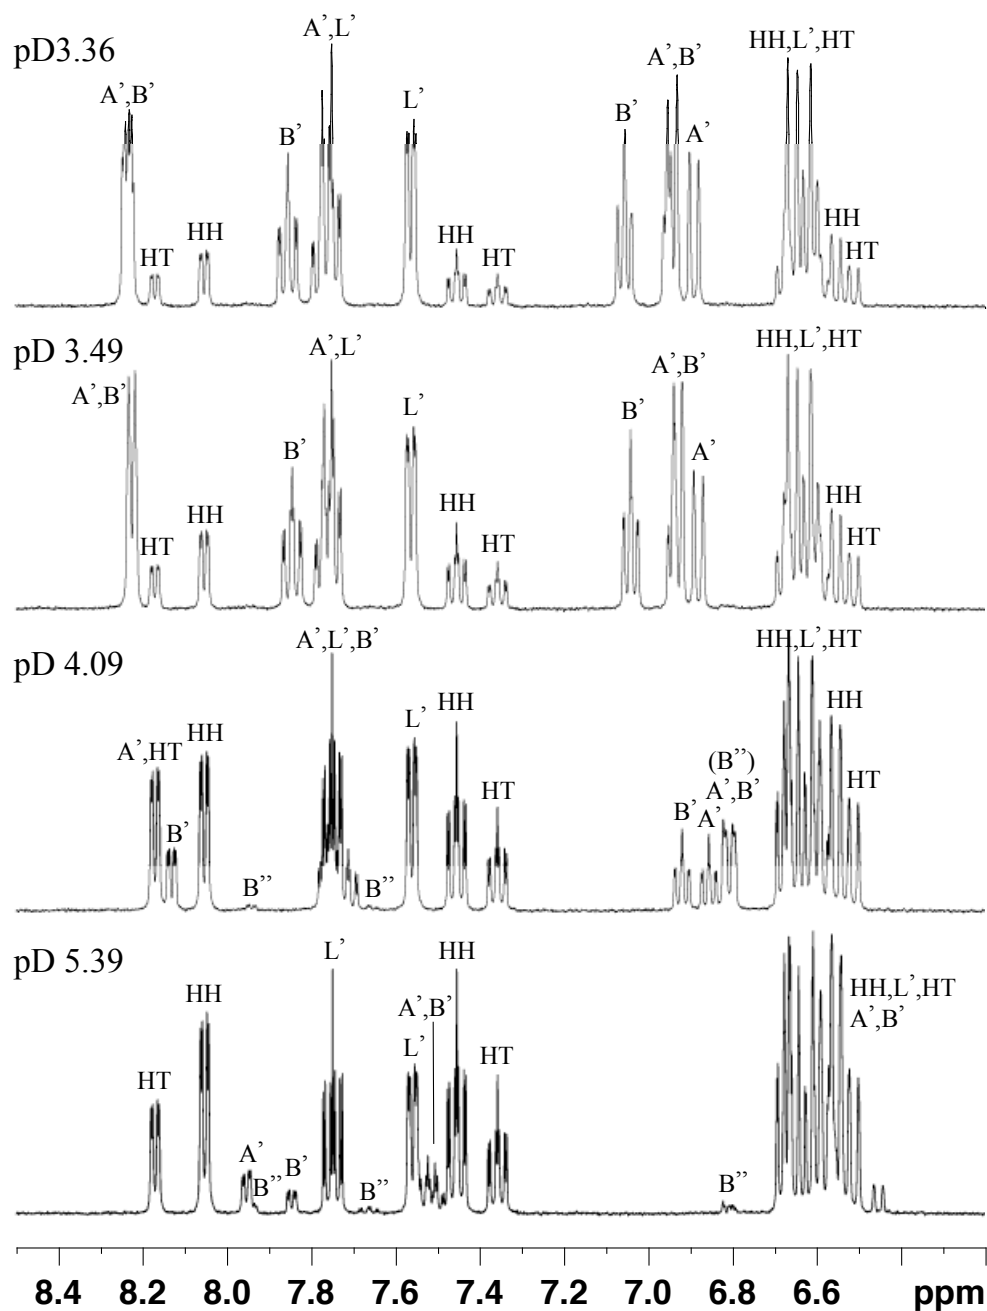

**Fig. S4.** Detailed assignments of the  $^1\text{H}$  NMR signals in the region of  $\alpha$ -pyridone moiety (8.5–6.2 ppm) in the presence of excess free ligand ( $C_{L(\text{add})} = 8.0 \text{ mmol dm}^{-3}$ ).  $C_{\text{HH}} = 8.0 \text{ mmol dm}^{-3}$ ,  $I = 0.1 \text{ mol dm}^{-3}$ , and  $T = 26^\circ\text{C}$ . Symbol notations used in this figure are same as those in Fig. S3.

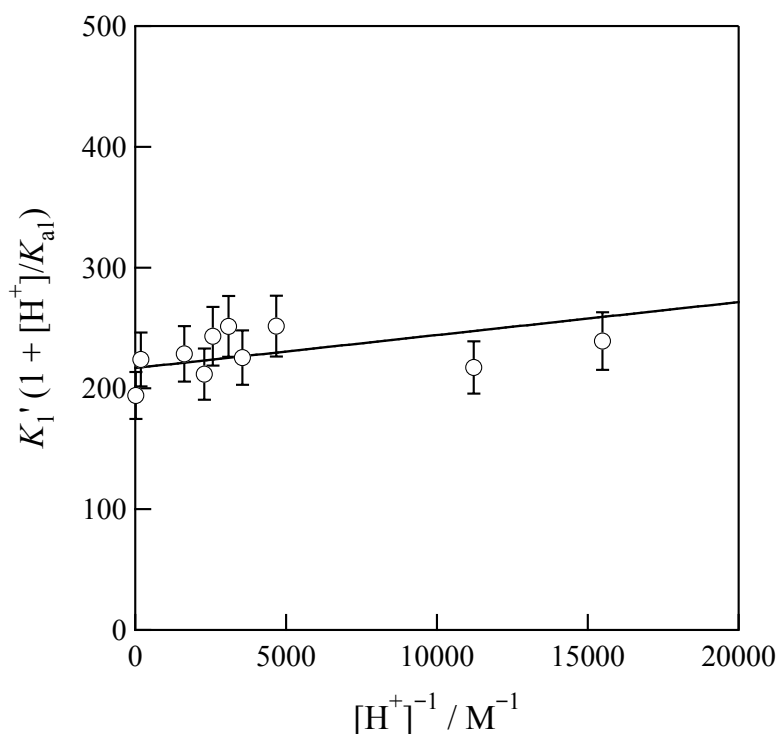

**Fig. S5.** The plot of  $K_1'(1+[H^+]/K_{a1})$  against  $[H^+]^{-1}$  in Scheme 2. The unavoidable error of each plot ( $\sim 10\%$ ) comes from the peak integration analysis of the NMR data.



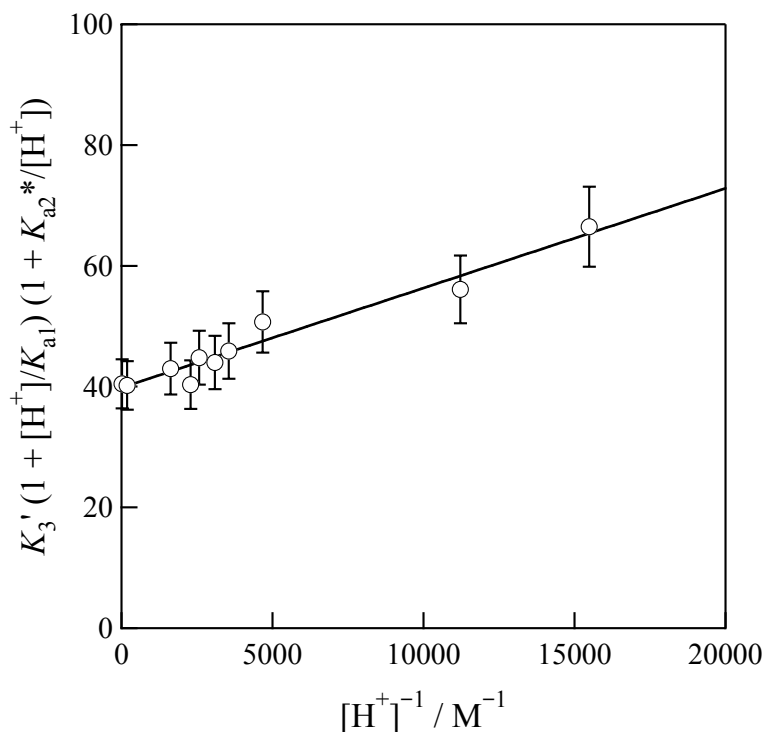

**Fig. S6.** The plot of  $K_3'(1+[H^+]/K_{a1})(1+K_{a2}*/[H^+])$  against  $[H^+]^{-1}$  in Scheme 2. The unavoidable error of each plot ( $\sim 10\%$ ) comes from the peak integration analysis of the NMR data.

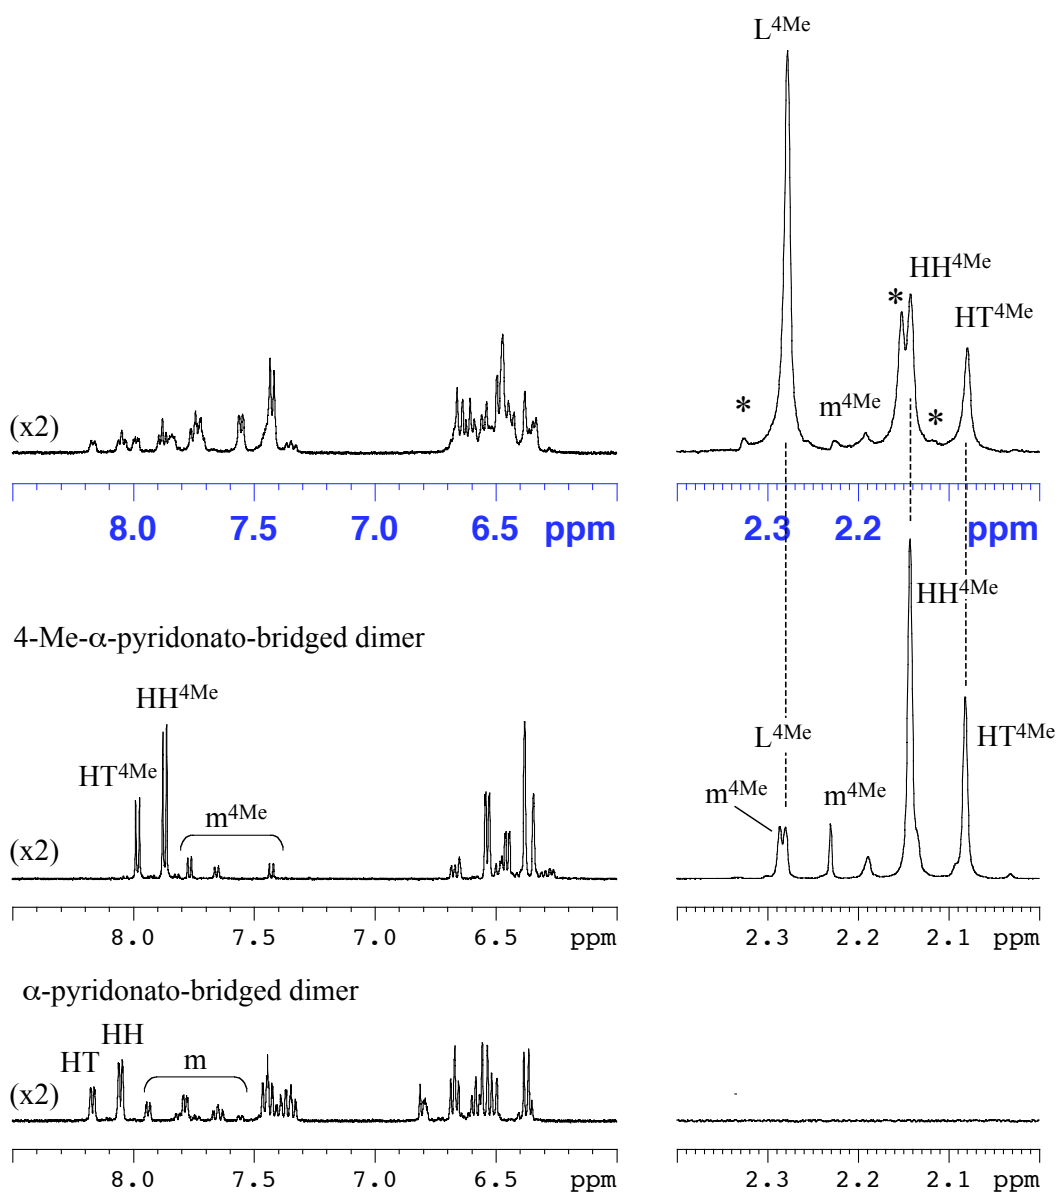

**Fig. S7.** The  $^1\text{H}$  NMR spectrum of the reaction mixture of the  $\alpha$ -pyridonato-bridged dimer ( $C_{\text{HH}} = 0.0144 \text{ mol dm}^{-3}$ ) and 4-methyl- $\alpha$ -pyridone ( $\text{L}^{4\text{Me}}$ ,  $C_{\text{L}^{4\text{Me}}} = 0.034 \text{ mol dm}^{-3}$ ) (top). For reference, the  $^1\text{H}$  NMR spectra of the 4-methyl- $\alpha$ -pyridonato-bridged dimer,  $[\text{Pd}_2(\text{en})_2(4\text{-methyl-}\alpha\text{-pyridonato})_2]^{2+}$  (middle), and the  $\alpha$ -pyridonato-bridged dimer,  $[\text{Pd}_2(\text{en})_2(\alpha\text{-pyridonato})_2]^{2+}$  in  $\text{D}_2\text{O}$  (bottom) are also shown in this Figure. The symbol “\*” denotes the signals of the mixed-ligand dimers and monomers.
